# Supplementary material for: Quantum dots coupled streptavidin and its application in lipid rafts protein characterization
Source: Research Square preprint supplement (doi:10.21203/rs.3.rs-7619570/v1), 2025-10-28
Supplement: Supplementary file 1 [file 5b57f29a2b9798578031b533.docx]

**Supplementary File**

Quantum dots coupled streptavidin and its application in lipid rafts protein characterization

Shiying Zhai a, 1, Hao Chi a, 1, Sheng Tiana, 1, Michael Adu-Frimpongb, Xia Caoa, Qilong Wanga,Shanshan Tonga,*

1These authors contributed equally to the work

*Corresponding author: Shanshan Tong, E-mail: tongss_han@163.com

aSchool of Pharmacy, Jiangsu University, Zhenjiang, Jiangsu, 212000, PR China

bSchool of Chemical and Biochemical Sciences, C. K. Tedam University of Technology and Applied Sciences (CKT-UTAS), Navrongo, UK-0215-5321, Ghana


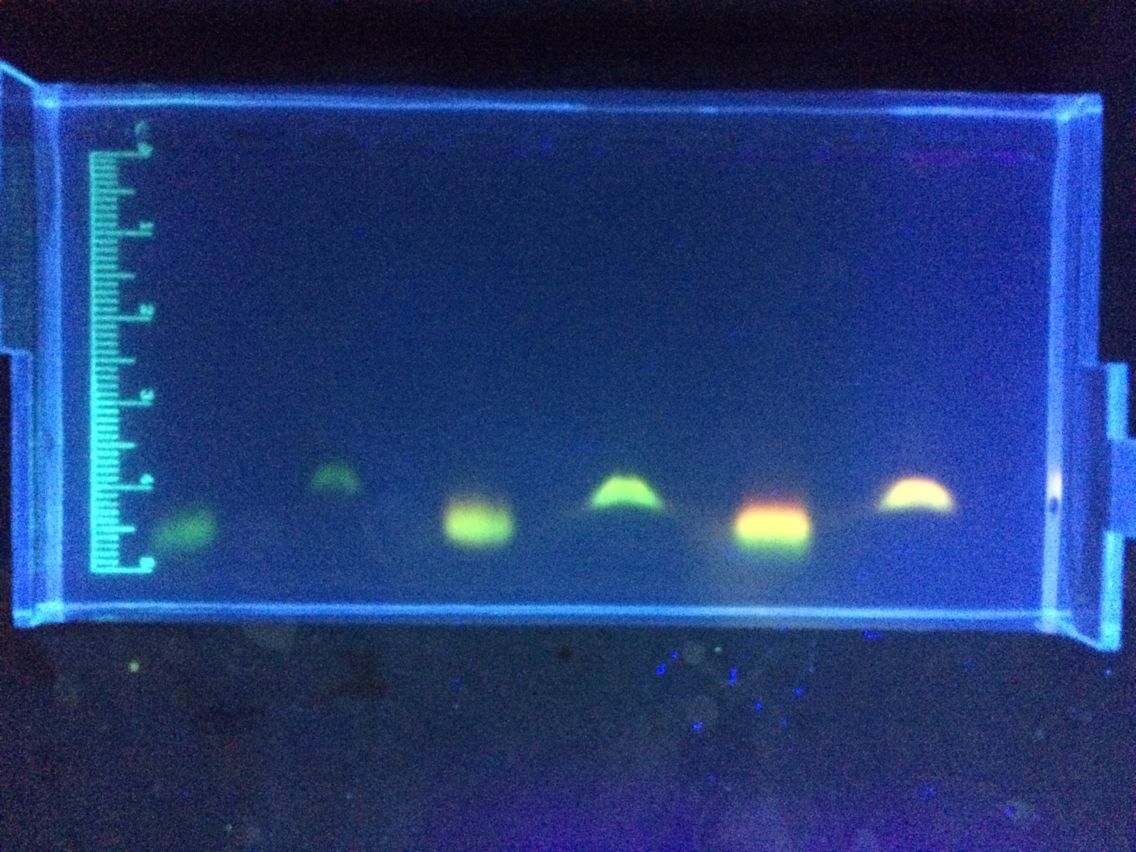


Figure S1 full uncropped Gels and Blots image
